# Supplementary material for: Environmental Enrichment Improves Cognitive Deficits, AD Hallmarks and Epigenetic Alterations Presented in 5xFAD Mouse Model
Source: PubMed Central journal article supplement (PMC6104164; doi:10.3389/fncel.2018.00224), 2018-08-15
Supplement: Table_4.pdf [file Table_4.pdf]

Table 4. Parameters measured in the Elevated Plus Maze Test (EPM). (n): number of events. Results are expressed as a mean  $\pm$  Standard error of the mean (SEM). \* $p$  <0.05; \*\* $p$  <0.01; \*\*\* $p$  <0.001; \*\*\*\* $p$  <0.0001 vs 5xFAD-Ct. # $p$  <0.05; ## $p$  <0.01; ### $p$  <0.001; #### $p$  <0.0001 vs Wt-Ct.

|                                  | Wt-Ct                | 5xFAD-Ct                  | 5xFAD-EE                 |
|----------------------------------|----------------------|---------------------------|--------------------------|
| <b>Total Distance (cm)</b>       | 1,098.28 $\pm$ 44.89 | 1,014.43 $\pm$ 137.47**** | 1,131.26 $\pm$ 90.23**** |
| <b>Time in Zone Center (sec)</b> | 45.96 $\pm$ 7.53     | 33.78 $\pm$ 4.88          | 27.92 $\pm$ 9.87         |
| <b>Time in Open Arms (sec)</b>   | 53.29 $\pm$ 9.47#    | 61.36 $\pm$ 13.66         | 116.18 $\pm$ 21.51*,#    |
| <b>Time in Closed Arms (sec)</b> | 200.68 $\pm$ 13.93   | 204.13 $\pm$ 15.81        | 155.19 $\pm$ 21.12       |
| <b>Rearings (n)</b>              | 13.67 $\pm$ 0.70***  | 6.57 $\pm$ 0.95           | 12.00 $\pm$ 1.60**       |
| <b>Groomings (n)</b>             | 4.75 $\pm$ 0.37      | 2.93 $\pm$ 0.52           | 3.69 $\pm$ 0.43          |
| <b>Defecations (n)</b>           | 0.00 $\pm$ 0.00      | 0.50 $\pm$ 0.20           | 0.31 $\pm$ 0.17          |
| <b>Urinations (n)</b>            | 0.67 $\pm$ 0.22      | 0.64 $\pm$ 0.44           | 0.23 $\pm$ 0.23          |
